# Supplementary material
Source: publisher figshare collection journal article supplement (https://gsapubs.figshare.com/articles/dataset/_/19401212)

Jensen et al., 2021  
Submitted to Geosphere

## Supplement 6. CL images of zircons with a analyzed spots

|        |                                                     |
|--------|-----------------------------------------------------|
| CH-031 | White Pine phase                                    |
| CH-036 | Clast from pebble dike from East Traverse Mountains |
| CH-039 | Matrix of pebble dike from East Traverse Mountains  |
| CH-053 | Red Pine porphyry                                   |
| CH-072 | Little Cottonwood stock                             |
| CH-073 | Little Cottonwood stock                             |
| CH-074 | Little Cottonwood stock                             |
| CH-108 | White Pine phase                                    |
| CH-115 | Red Pine porphyry                                   |
| CH-127 | White Pine phase                                    |
| CH-160 | White Pine phase                                    |

CH-031  
Mo Mineralized White Pine

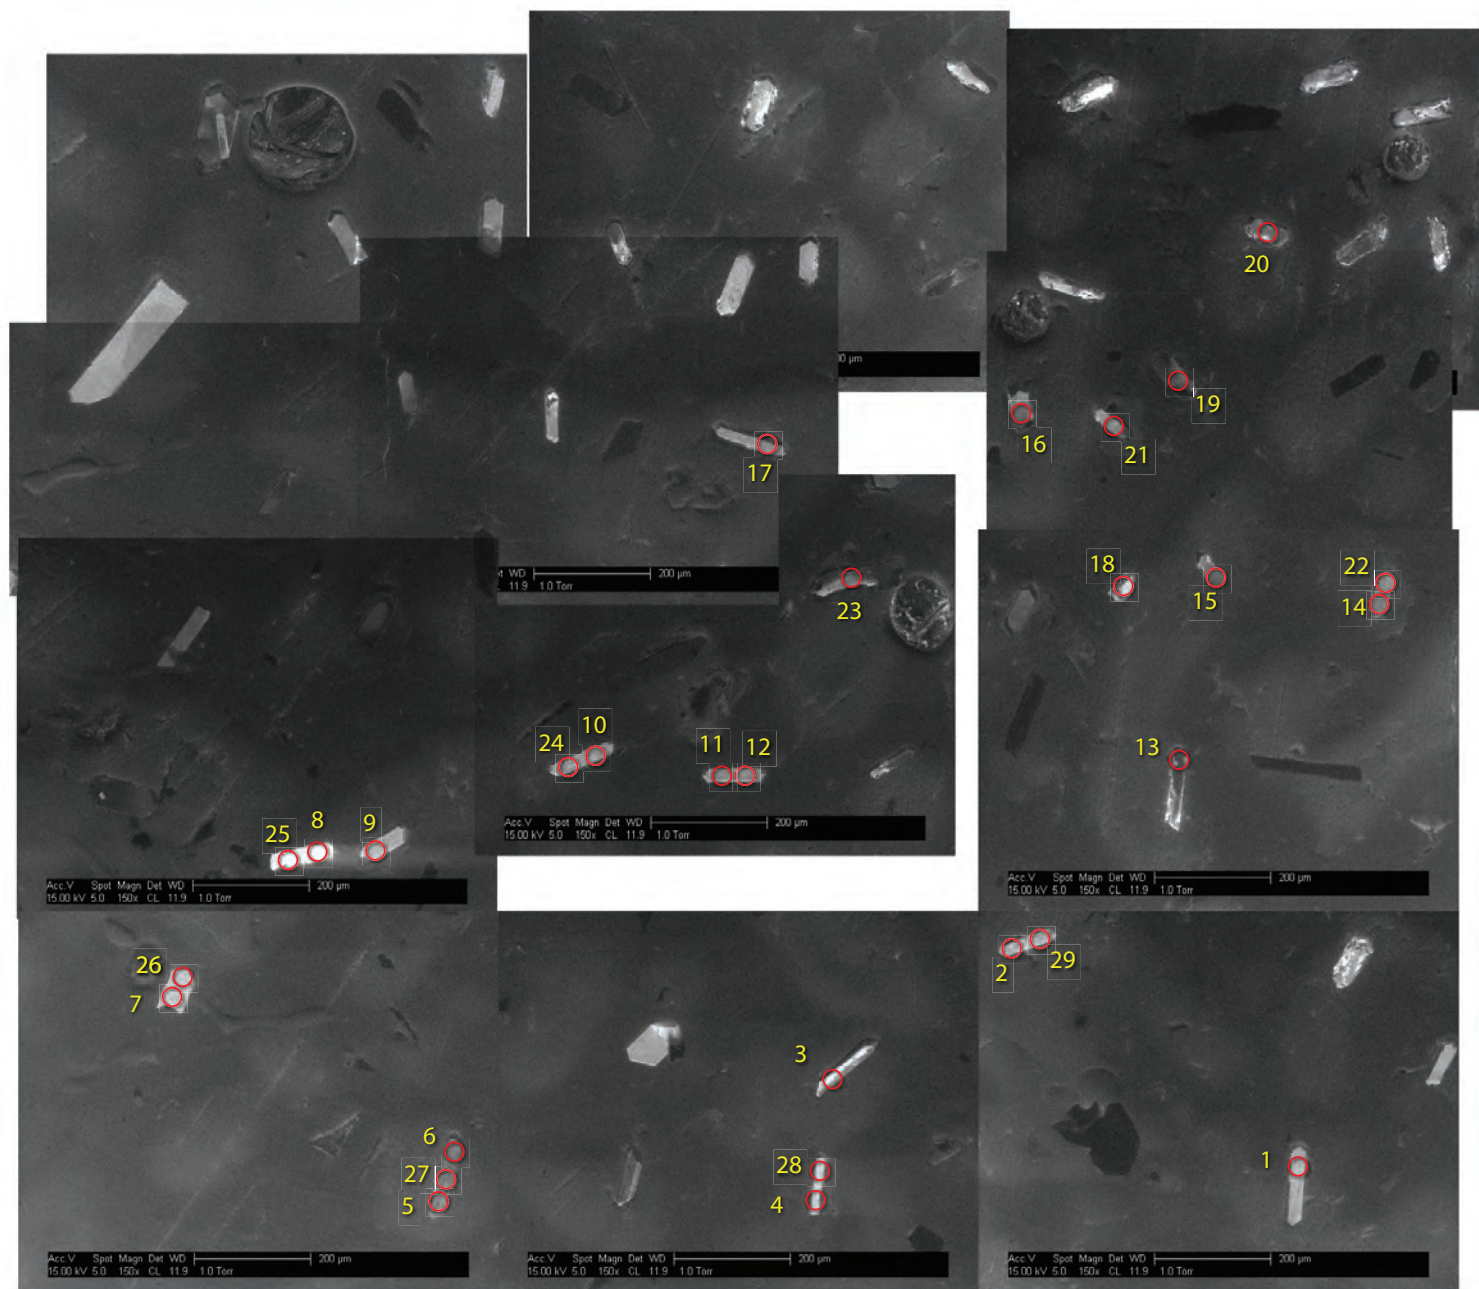

CH-036

Little Cottonwood stock clast in pebble dike on East Traverse Mountain

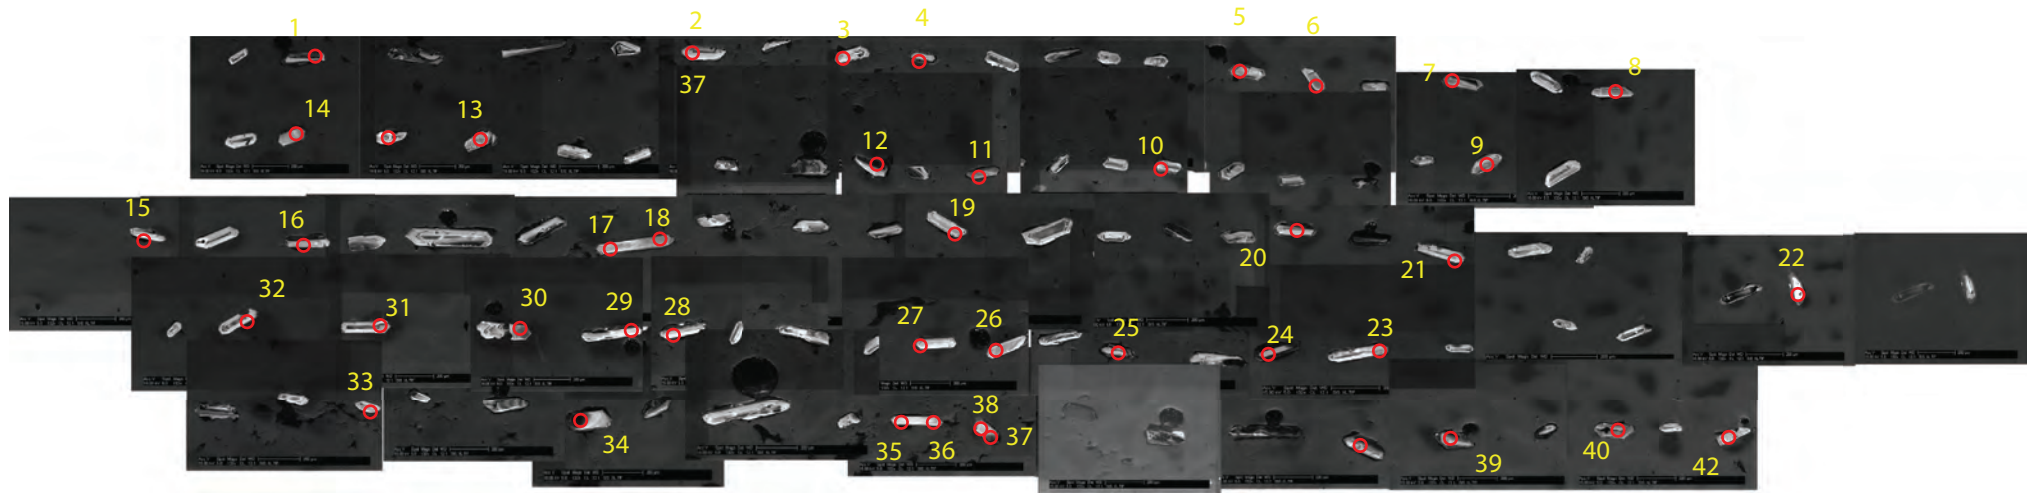

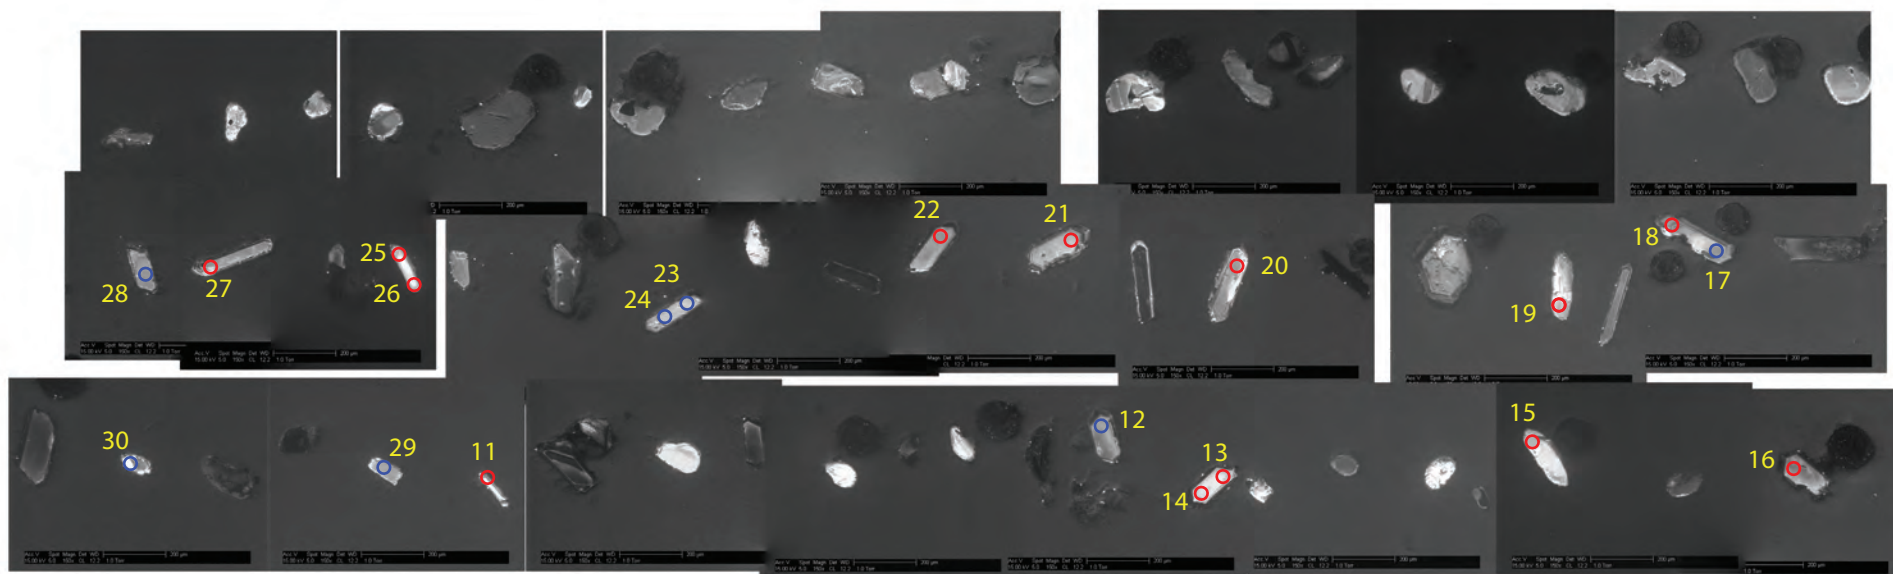

CH-39  
Pebble Dike Whole-rock  
Blue dots are Precambrian xenocrysts

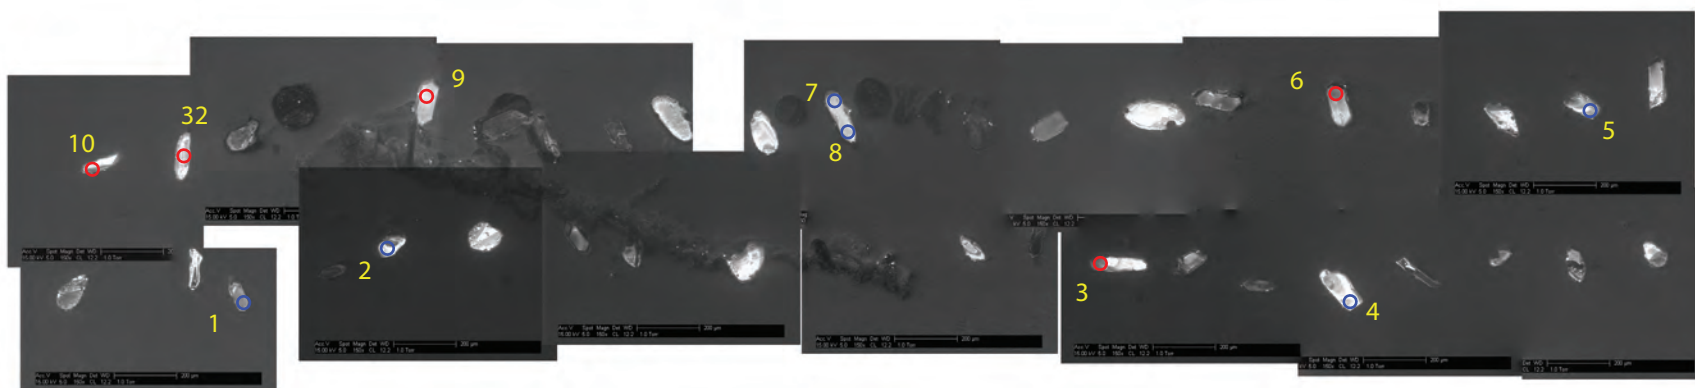



CH-053  
Red Pine phase  
Phaneritic texture

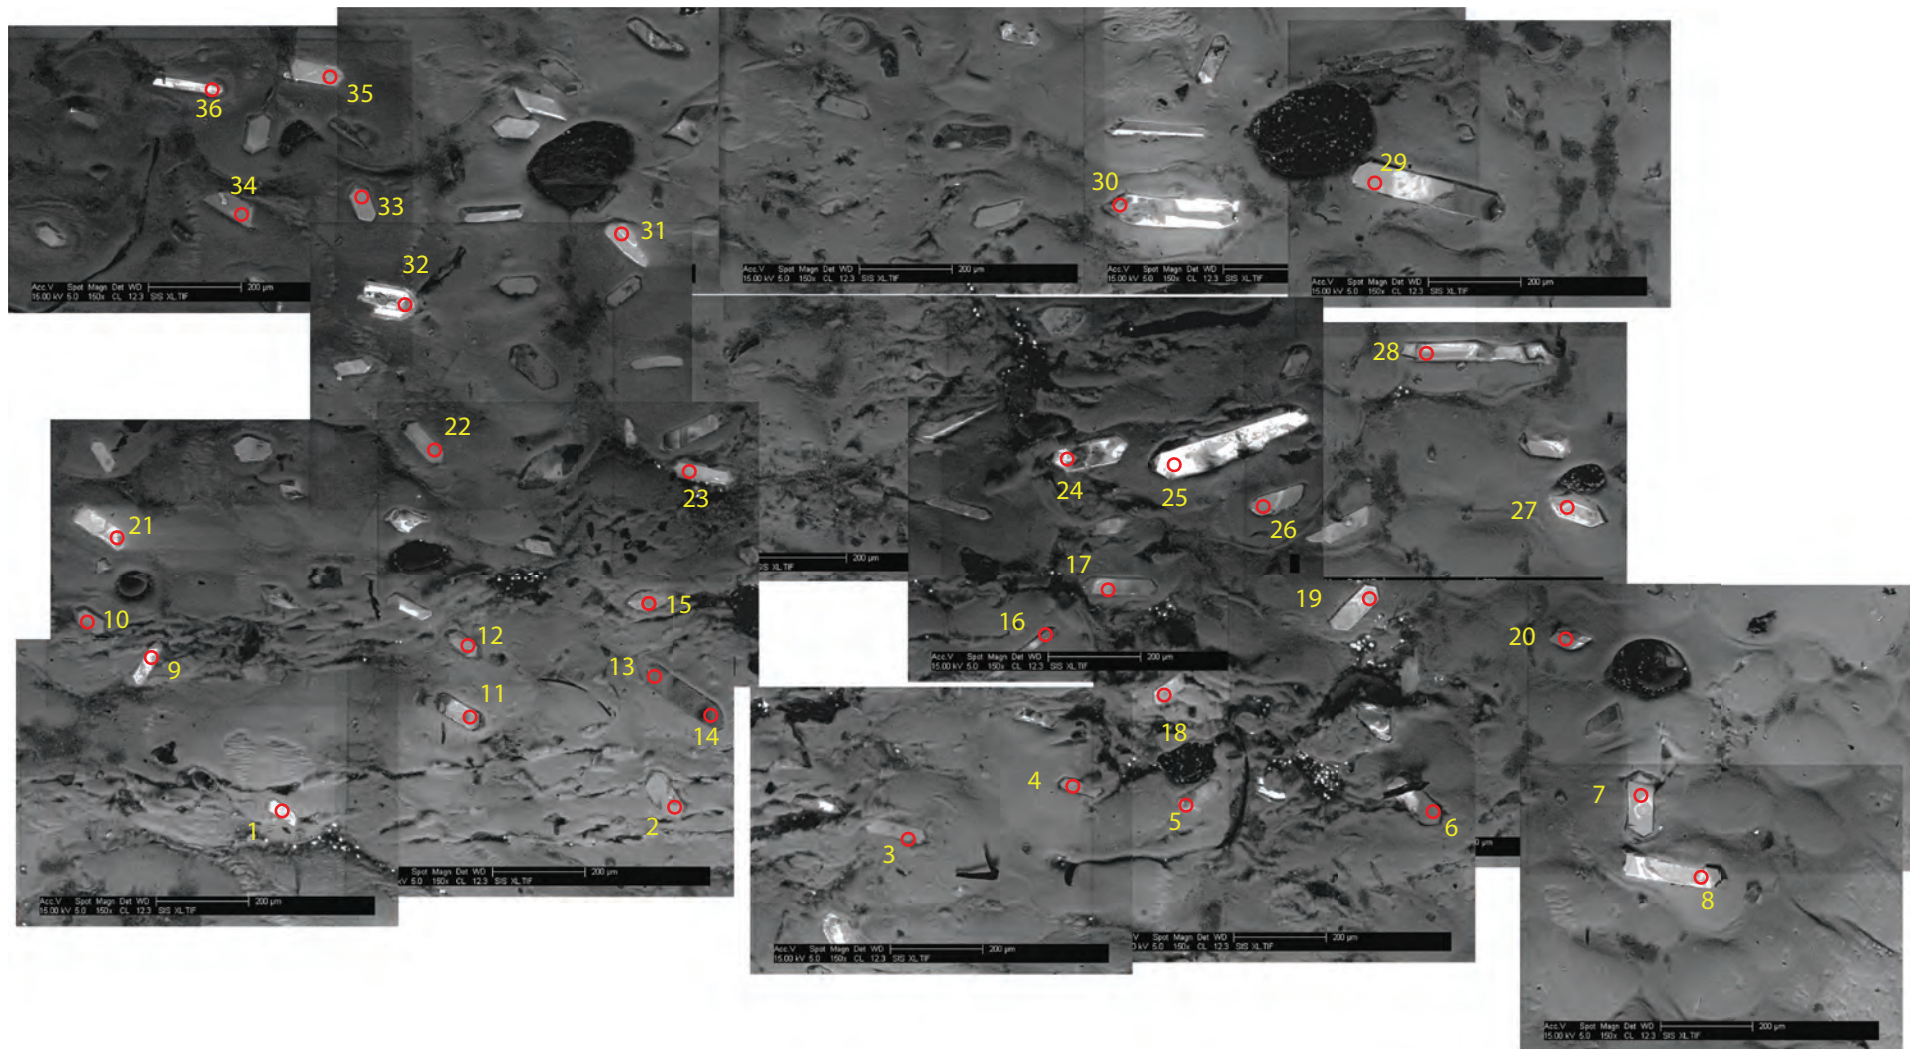

CH-072  
Little Cottonwood stock

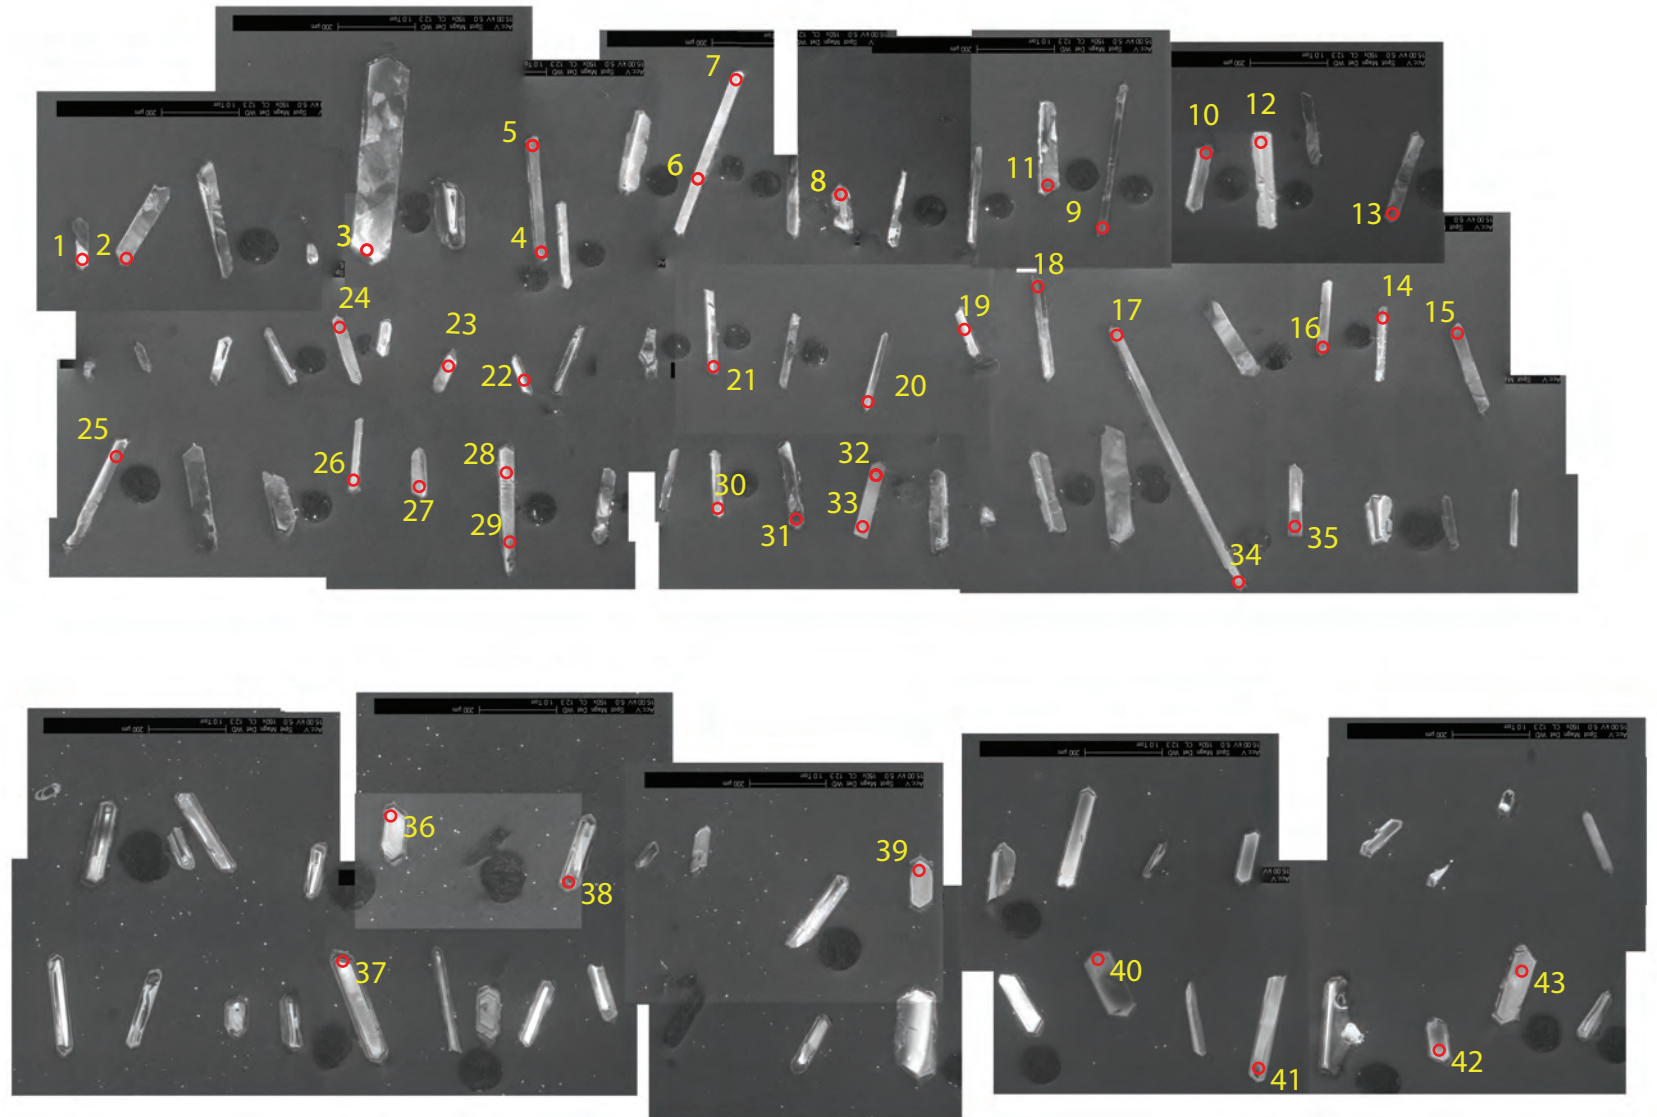



CH-073  
Little Cottonwood stock

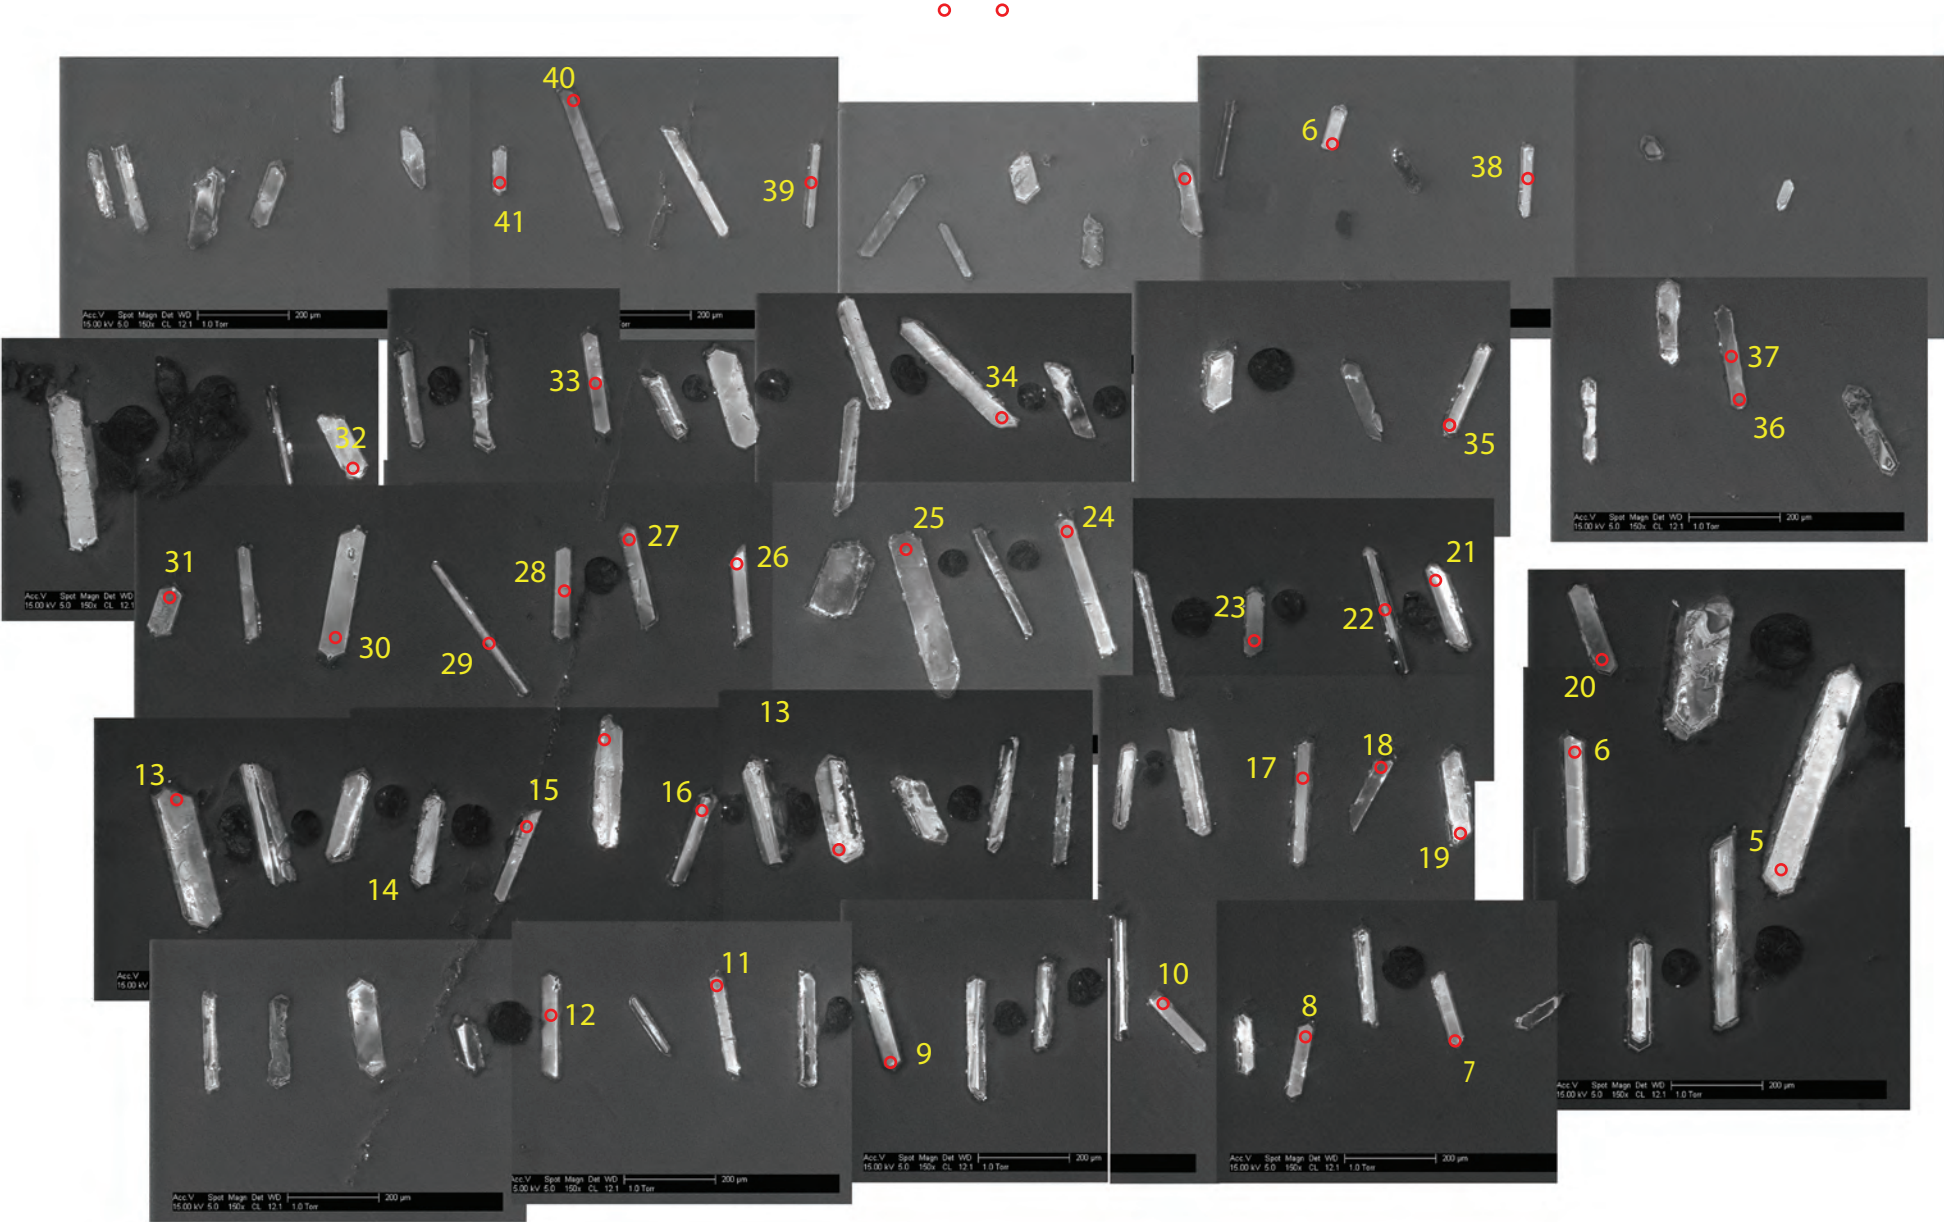

# CH-074 Little Cottonwood stock

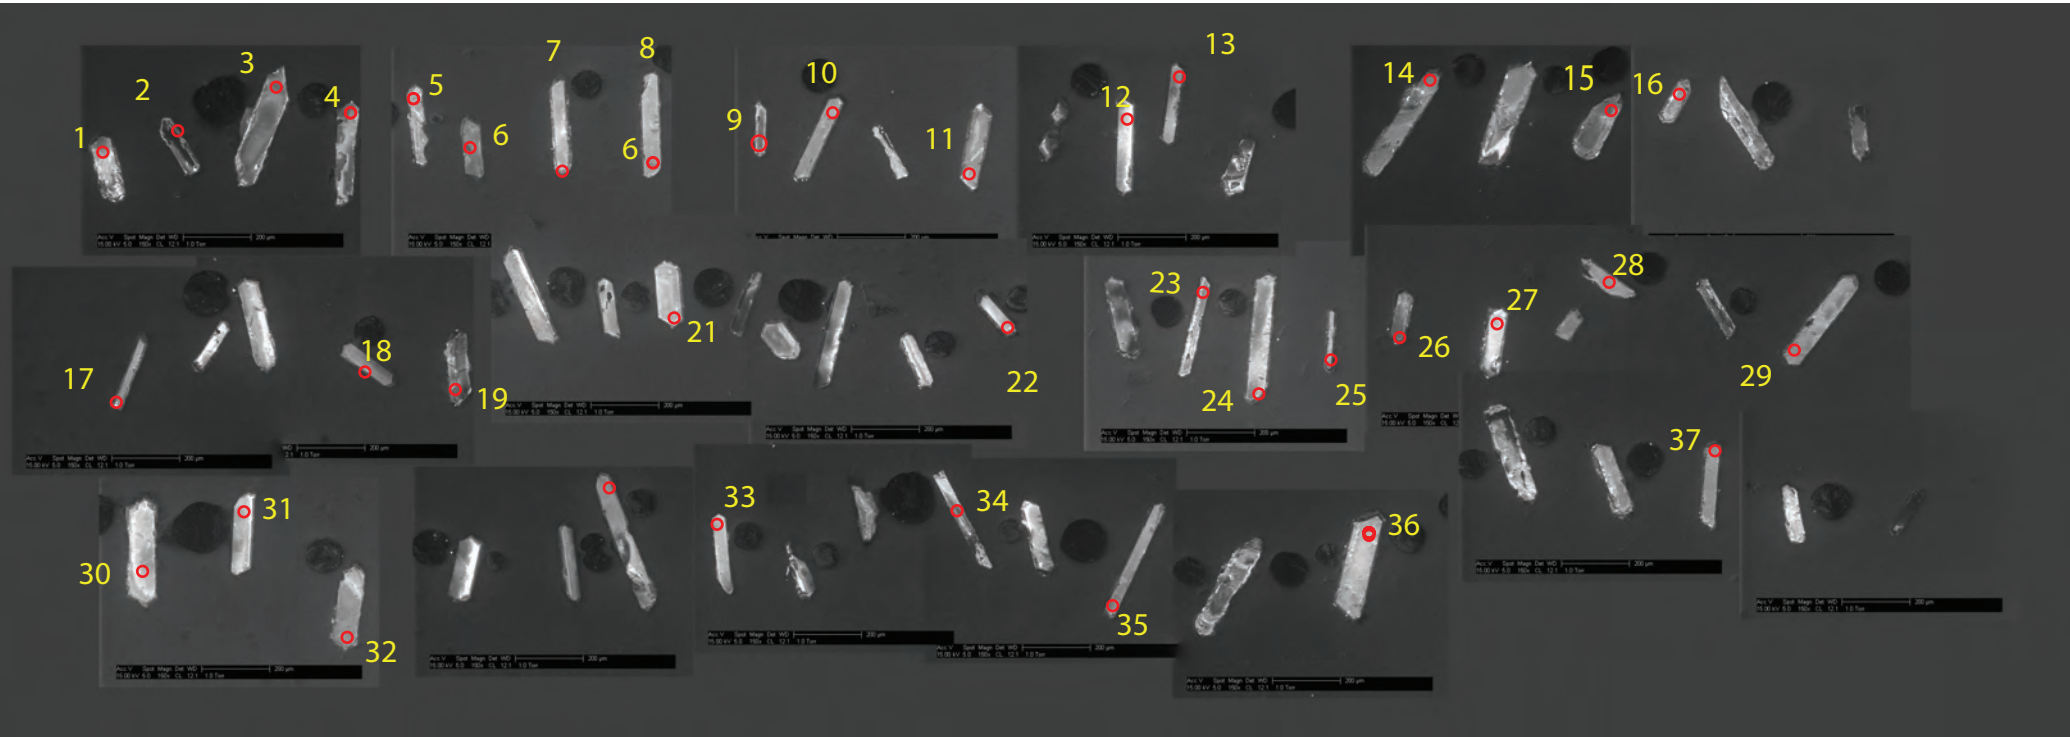



CH-108  
White Pine phase

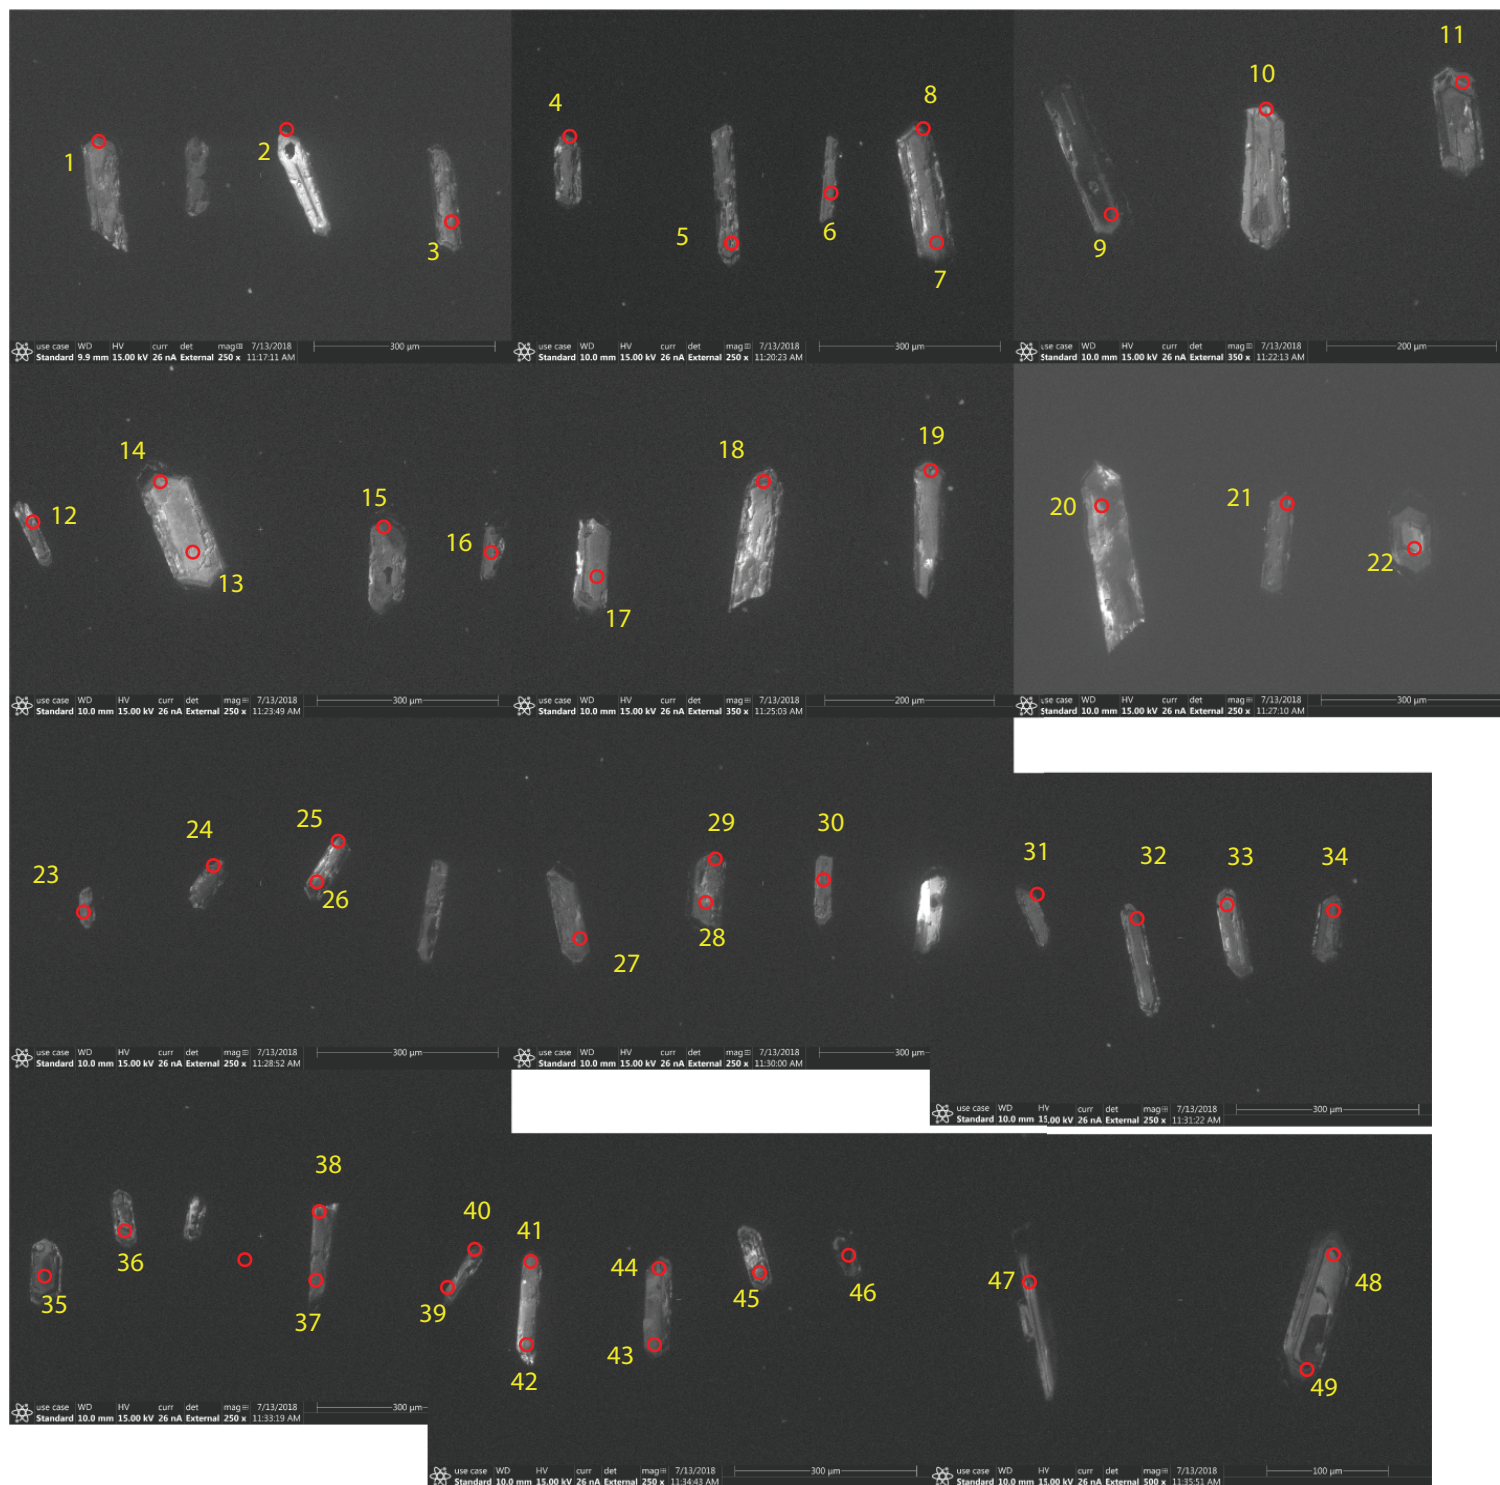



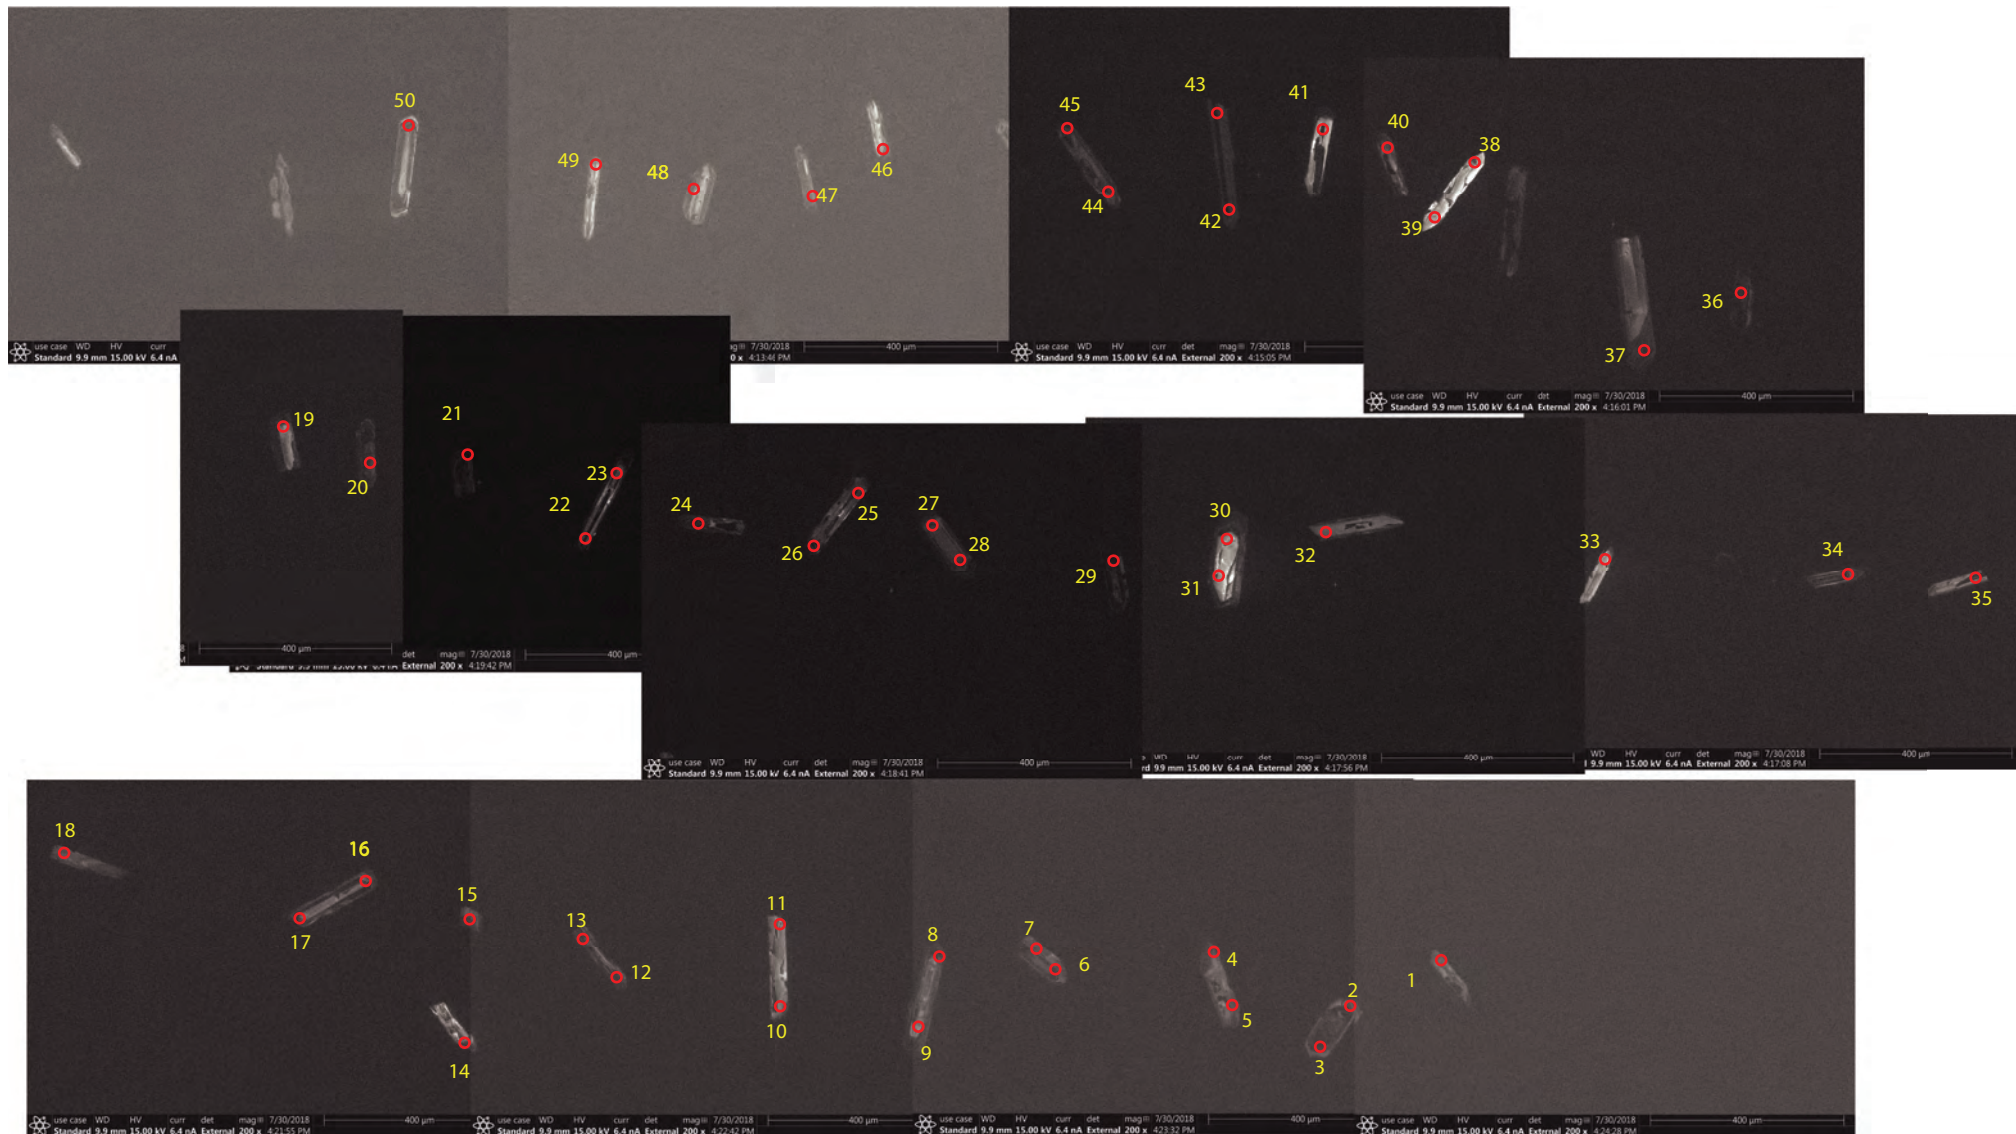

CH-115  
Red Pine Porphyritic



CH-127  
White Pine phase

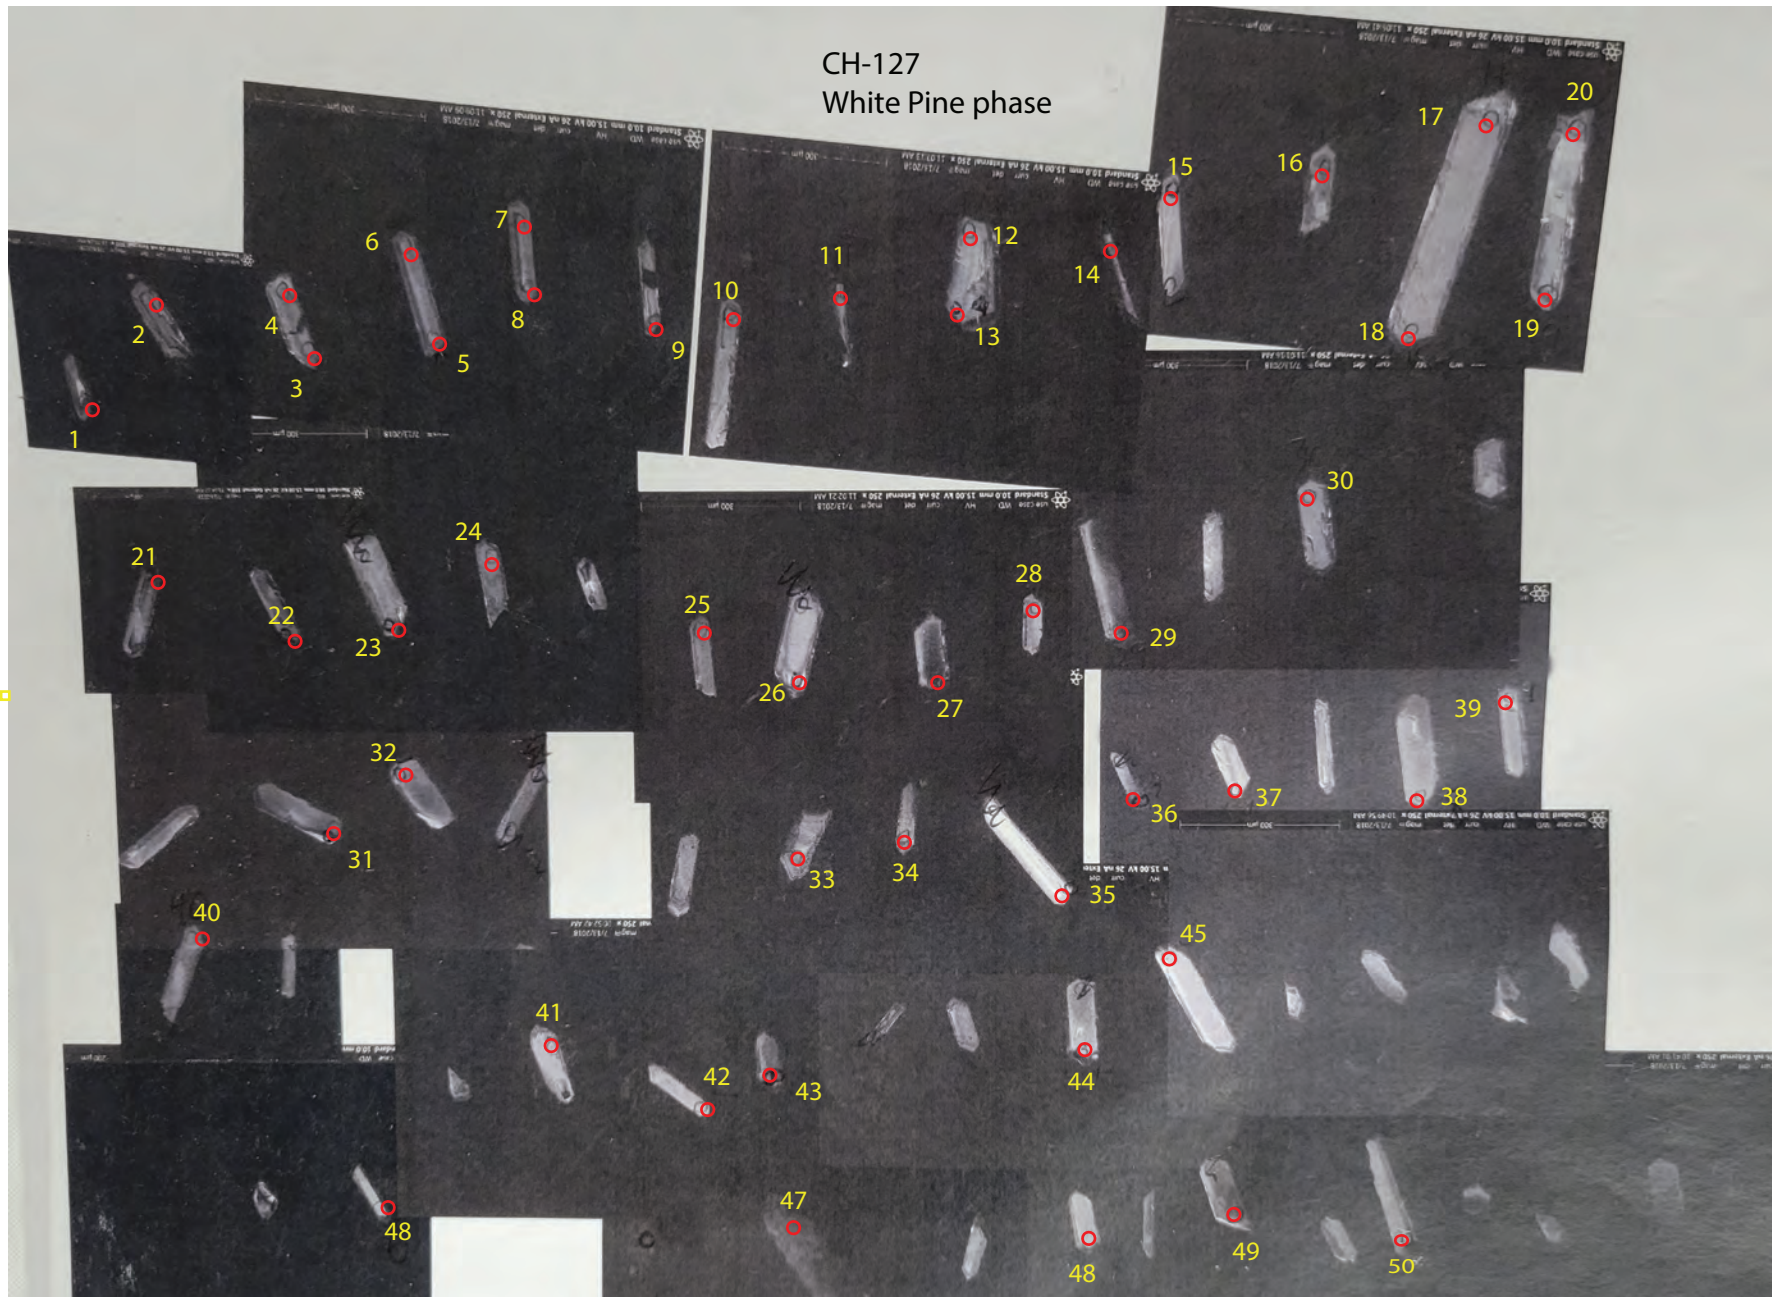



CH-160  
White Pine phase

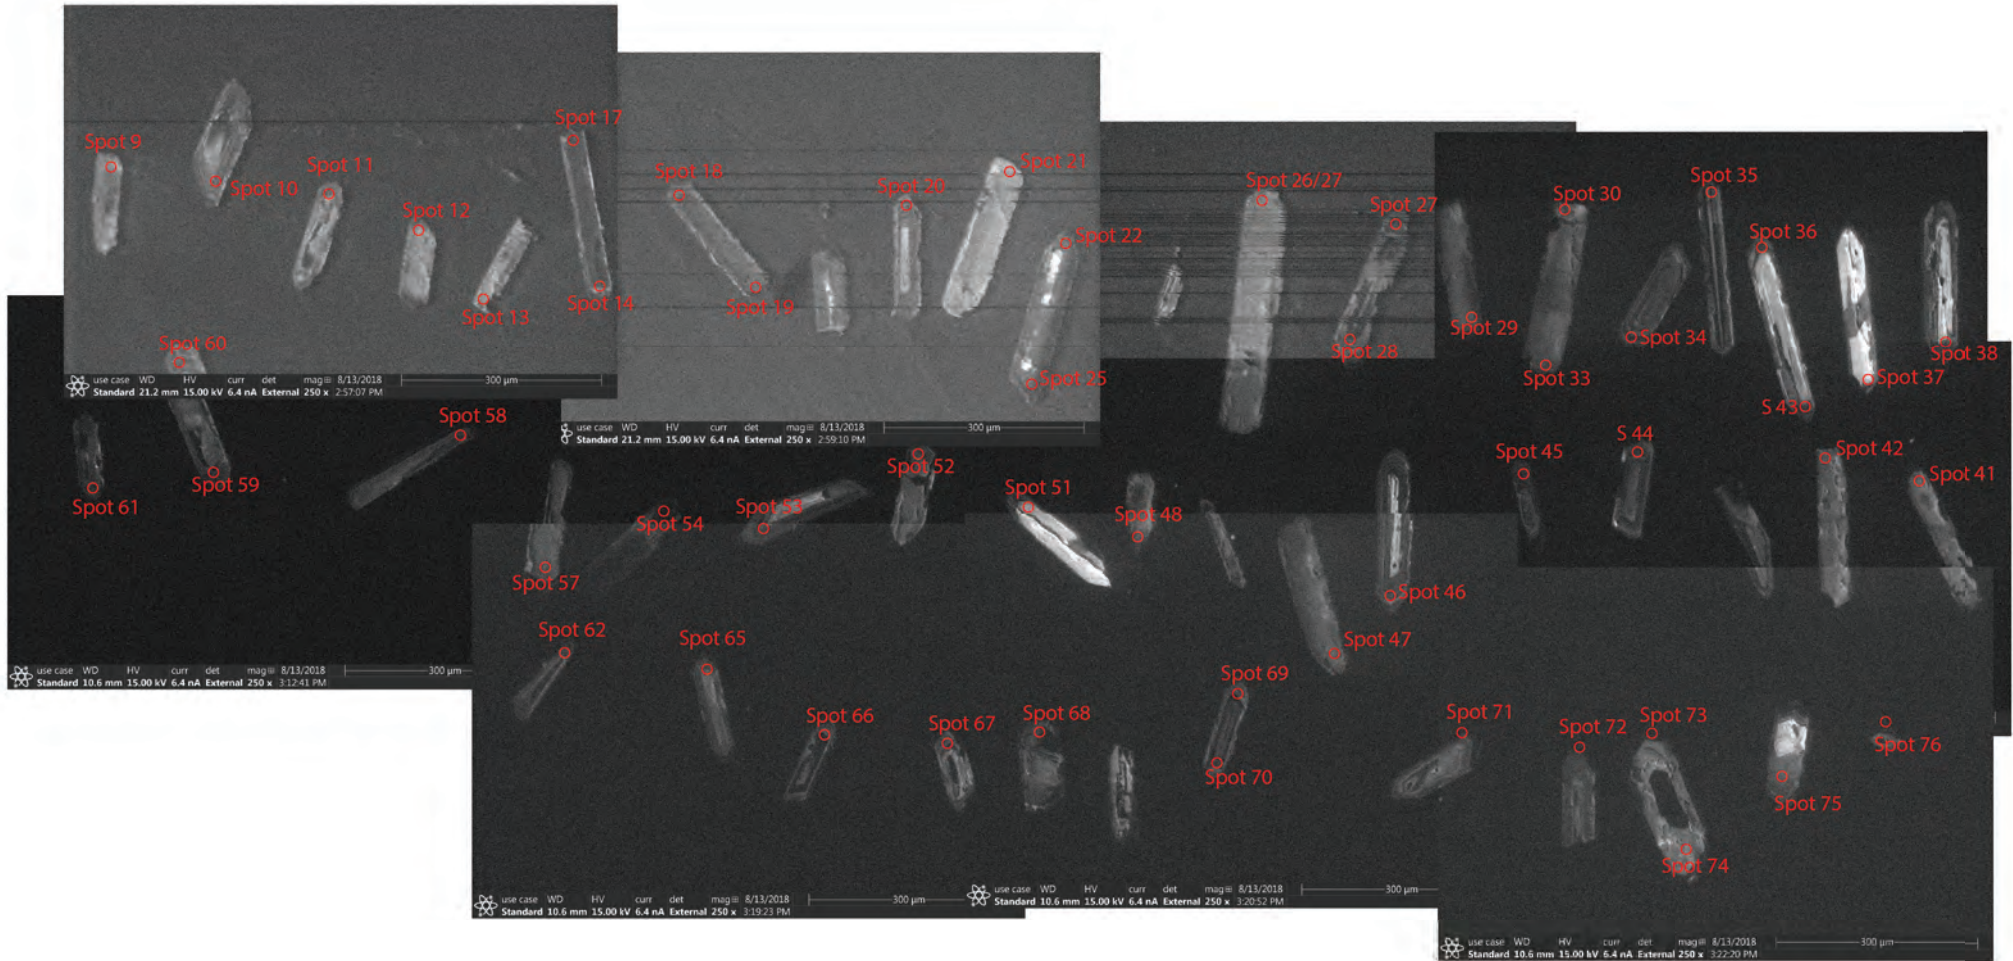

Supplement: Supplementary file 2 [file 1]
